# Supplementary material
Source: PubMed Central journal article supplement (PMC7542522)
Supplement: jamadermatol-e204097-s001.pdf [file jamadermatol-e204097-s001.pdf]

## Supplementary Online Content

Claeson M, Pandeya N, Dusingize J-C, et al. Assessment of incidence rate and risk factors for keratoacanthoma among residents of Queensland, Australia. *JAMA Dermatol*. Published online October 7, 2020. doi:10.1001/jamadermatol.2020.4097

**eTable 1.** Sensitivity Analysis of Phenotype Variables and Their Association With Keratoacanthoma Among Restricted Cohort of 24 079 Participants

**eTable 2.** Sensitivity Analysis of Ultraviolet Exposure Variables and Their Association With Keratoacanthoma Among Restricted Cohort of 24 079 Participants

**eTable 3.** Sensitivity Analysis of Lifestyle Variables and Their Association With Keratoacanthoma Among Restricted Cohort of 24 079 Participants

**eFigure.** Directed Acyclic Graph for the Association Between Lifestyle Variables and Keratoacanthoma

This supplementary material has been provided by the authors to give readers additional information about their work.

**eTable 1.** Sensitivity Analysis of Phenotype Variables and Their Association With Keratoacanthoma Among Restricted Cohort of 24 079 Participants

Includes 24,079 men and women in a restricted QSkin cohort that excluded participants with a previously excised keratinocyte cancer

| Variables                          | Participants with keratoacanthoma |            | Age & sex and phenotype and UV exposure adjusted <sup>b</sup> |
|------------------------------------|-----------------------------------|------------|---------------------------------------------------------------|
|                                    | No (n=23,983)                     | Yes (n=96) |                                                               |
|                                    | n (%) <sup>a</sup>                | n (%)      | HR (95% CI)                                                   |
| <b>Skin colour</b>                 |                                   |            |                                                               |
| Olive/Dark/Black                   | 2,539 (10.7)                      | 2 (2.1)    | Reference                                                     |
| Medium                             | 8,655 (36.3)                      | 35 (36.8)  | <b>4.37 (1.04 - 18.39)</b>                                    |
| Fair                               | 12,636 (53.0)                     | 58 (61.1)  | <b>4.54 (1.07 - 19.30)</b>                                    |
| <i>Missing</i>                     | 153                               | 1          |                                                               |
| <b>Sunburn tendency</b>            |                                   |            |                                                               |
| Not burn                           | 2,698 (11.3)                      | 7 (7.3)    | Reference                                                     |
| Burn a little                      | 11,081 (46.5)                     | 43 (44.8)  | 1.40 (0.62 - 3.16)                                            |
| Burn moderately                    | 7,443 (31.2)                      | 35 (36.5)  | 1.67 (0.71 - 3.93)                                            |
| Burn badly                         | 2,614 (11.0)                      | 11 (11.5)  | 1.63 (0.58 - 4.57)                                            |
| <i>Missing</i>                     | 147                               | 0          |                                                               |
| <b>Tanning ability</b>             |                                   |            |                                                               |
| Tan deeply                         | 6,425 (27.0)                      | 16 (16.7)  | Reference                                                     |
| Tan moderately                     | 12,121 (50.9)                     | 57 (59.4)  | 1.41 (0.80 - 2.49)                                            |
| Tan a little                       | 4,252 (17.8)                      | 20 (20.8)  | 1.30 (0.65 - 2.63)                                            |
| Not tan                            | 1,024 (4.3)                       | 3 (3.1)    | 0.74 (0.20 - 2.73)                                            |
| <i>Missing</i>                     | 161                               | 0          |                                                               |
| <b>Eye colour</b>                  |                                   |            |                                                               |
| Brown or Black                     | 6,469 (27.3)                      | 16 (16.7)  | Reference                                                     |
| Green or Hazel                     | 8,710 (36.8)                      | 33 (34.4)  | 1.24 (0.67 - 2.29)                                            |
| Blue or Grey                       | 8,489 (35.9)                      | 47 (49.0)  | 1.62 (0.88 - 2.98)                                            |
| <i>Missing</i>                     | 315                               | 0          |                                                               |
| <b>Hair colour</b>                 |                                   |            |                                                               |
| Dark brown/Black                   | 11,116 (46.6)                     | 35 (36.5)  | Reference                                                     |
| Light brown                        | 8,634 (36.2)                      | 41 (42.7)  | 1.23 (0.76 - 1.96)                                            |
| Blonde                             | 3,162 (13.3)                      | 16 (16.7)  | 1.26 (0.67 - 2.37)                                            |
| Red/Auburn                         | 935 (3.9)                         | 4 (4.2)    | 0.89 (0.29 - 2.73)                                            |
| <i>Missing</i>                     | 136                               | 0          |                                                               |
| <b>Freckles at age 21 y (face)</b> |                                   |            |                                                               |
| None                               | 12,505 (52.4)                     | 49 (51.0)  | Reference                                                     |
| A few                              | 7,243 (30.4)                      | 27 (28.1)  | 0.98 (0.60 - 1.59)                                            |
| Some                               | 3,063 (12.8)                      | 13 (13.5)  | 1.13 (0.59 - 2.16)                                            |
| Many                               | 1,038 (4.4)                       | 7 (7.3)    | 2.14 (0.88 - 5.24)                                            |
| <i>Missing</i>                     | 134                               | 0          |                                                               |

CI – confidence interval; HR – hazard ratio; UV – ultraviolet; y – years

<sup>a</sup>Due to rounding, percentages may not add to 100%.

<sup>b</sup>Model considers other measures of phenotype and UV exposure variables.

Skin colour adjusted for age, sex, sunburn tendency, tanning ability, freckles at age 21 and previous actinic keratoses/keratinocyte cancers destroyed or excised.

Sunburn tendency adjusted for age, sex, skin colour, tanning ability, eye colour, hair colour, freckles at age 21, sunburns <10 y old, sunburns 10-20 y old, sunburns >20 y old and previous actinic keratoses/keratinocyte cancers destroyed or excised.

© 2020 American Medical Association. All rights reserved.

Tanning ability adjusted for age, sex, skin colour, sunburn tendency, eye colour, hair colour, freckles at age 21 and previous actinic keratoses/keratinocyte cancers destroyed or excised.

Eye colour adjusted for age, sex, skin colour, sunburn tendency, tanning ability, hair colour, freckles at age 21 and previous actinic keratoses/keratinocyte cancers destroyed or excised.

Hair colour adjusted for age, sex, skin colour, sunburn tendency, tanning ability, eye colour, freckles at age 21, sunburns <10 years old, sunburns 10-20 years old and previous actinic keratoses/keratinocyte cancers destroyed or excised.

Freckles at age 21 adjusted for age, sex, skin colour, sunburn tendency, tanning ability, eye colour, hair colour, sunburns <10 years old, sunburns 10-20 years old and previous actinic keratoses/keratinocyte cancers destroyed or excised.

**eTable 2.** Sensitivity Analysis of Ultraviolet Exposure Variables and Their Association With Keratoacanthoma Among Restricted Cohort of 24 079 Participants

Includes 24,079 men and women in a restricted QSkin cohort that excluded participants with a previously excised keratinocyte cancer

|                                                           | Participants with keratoacanthoma |            | Age & sex and phenotype adjusted <sup>b</sup> |
|-----------------------------------------------------------|-----------------------------------|------------|-----------------------------------------------|
|                                                           | No (n=23,983)                     | Yes (n=96) |                                               |
| Variables                                                 | n (%) <sup>a</sup>                | n (%)      | HR (95% CI)                                   |
| Sunburns <10 years old                                    |                                   |            |                                               |
| Never                                                     | 5,484 (25.2)                      | 23 (27.1)  | Reference                                     |
| 1-5                                                       | 9,995 (45.9)                      | 33 (38.8)  | 0.78 (0.45 - 1.33)                            |
| 6-10                                                      | 3,468 (15.9)                      | 18 (21.2)  | 1.22 (0.65 - 2.28)                            |
| 11+                                                       | 2,817 (12.9)                      | 11 (12.9)  | 0.90 (0.43 - 1.88)                            |
| <i>Missing</i>                                            | 2,219                             | 11         |                                               |
| Sunburns 10-20 years old                                  |                                   |            |                                               |
| Never                                                     | 1,555 (6.7)                       | 6 (6.7)    | Reference                                     |
| 1-5                                                       | 10,727 (46.3)                     | 35 (38.9)  | 0.81 (0.35 - 1.89)                            |
| 6-10                                                      | 5,500 (23.8)                      | 25 (27.8)  | 1.23 (0.51 - 2.97)                            |
| 11+                                                       | 5,374 (23.2)                      | 24 (26.7)  | 1.19 (0.49 - 2.91)                            |
| <i>Missing</i>                                            | 827                               | 6          |                                               |
| Sunburns >20 years old                                    |                                   |            |                                               |
| Never                                                     | 4,059 (17.6)                      | 16 (17.8)  | Reference                                     |
| 1-5                                                       | 12,447 (54.1)                     | 42 (46.7)  | 0.89 (0.50 - 1.57)                            |
| 6-10                                                      | 3,708 (16.1)                      | 15 (16.7)  | 1.10 (0.54 - 2.24)                            |
| 11+                                                       | 2,793 (12.1)                      | 17 (18.9)  | 1.58 (0.79 - 3.16)                            |
| <i>Missing</i>                                            | 976                               | 6          |                                               |
| Previous actinic keratoses/keratinocyte cancers destroyed |                                   |            |                                               |
| Never                                                     | 15,363 (64.2)                     | 33 (34.4)  | N/A                                           |
| Ever                                                      | 8,554 (35.8)                      | 63 (65.6)  | N/A                                           |
| <i>Missing</i>                                            | 66                                | 0          |                                               |

CI – confidence interval; HR – hazard ratio; UV – ultraviolet

<sup>a</sup>Due to rounding, percentages may not add to 100%.

<sup>b</sup>Model considers other measures of phenotype

Sunburns <10 years old adjusted for age, sex, skin colour, sunburn tendency, tanning ability, eye colour, hair colour and freckles at age 21.

Sunburns 10-20 years old adjusted for age, sex, skin colour, sunburn tendency, tanning ability, eye colour, hair colour and freckles at age 21.

Sunburns >20 years old adjusted for age, sex, skin colour, sunburn tendency, tanning ability, eye colour, hair colour and freckles at age 21.

(Note: The risk estimate for previous actinic keratoses/keratinocyte cancers destroyed changed minimally (<10%) when adjusted for other measures of phenotype – hence not adjusted.)

**eTable 3.** Sensitivity Analysis of Lifestyle Variables and Their Association With Keratoacanthoma Among Restricted Cohort of 24 079 Participants

Includes 24,079 men and women in a restricted QSkin cohort that excluded participants with a previously excised keratinocyte cancer

|                       | Participants with keratoacanthoma |            | Age & sex and educational level adjusted <sup>b</sup> |
|-----------------------|-----------------------------------|------------|-------------------------------------------------------|
|                       | No (n=23,983)                     | Yes (n=96) |                                                       |
| Variables             | n (%) <sup>a</sup>                | n (%)      | HR (95% CI)                                           |
| Smoking status        |                                   |            |                                                       |
| Never smoker          | 13,171 (55.1)                     | 50 (52.1)  | Reference                                             |
| Past smoker           | 8,409 (35.2)                      | 35 (36.5)  | 0.98 (0.63 - 1.52)                                    |
| Current smoker        | 2,326 (9.7)                       | 11 (11.5)  | 1.30 (0.67 - 2.53)                                    |
| Missing               | 77                                | 0          |                                                       |
| Alcoholic drinks/week |                                   |            |                                                       |
| None                  | 4,731 (19.8)                      | 14 (14.7)  | Reference                                             |
| <1                    | 4,128 (17.3)                      | 17 (17.9)  | 1.63 (0.80 - 3.32)                                    |
| 2-13                  | 11,210 (47.0)                     | 45 (47.4)  | 1.60 (0.87 - 2.93)                                    |
| 14-28+                | 3,805 (15.9)                      | 19 (20.0)  | 1.87 (0.92 - 3.81)                                    |
| Missing               | 109                               | 1          |                                                       |

CI – confidence interval; HR – hazard ratio; UV – ultraviolet; y – years

<sup>a</sup>Due to rounding, percentages may not add to 100%.

<sup>b</sup>Model considers age, sex and educational level as per directed acyclic graph in eFigure 1.

Smoking status adjusted for age, sex and educational level.

Alcoholic drinks/week adjusted for age, sex and educational level.

(Note: No change in the risk estimates when additionally adjusted for phenotype or UV exposure measures – hence not adjusted.)

**eFigure.** Directed Acyclic Graph for the Association Between Lifestyle Variables and Keratoacanthoma

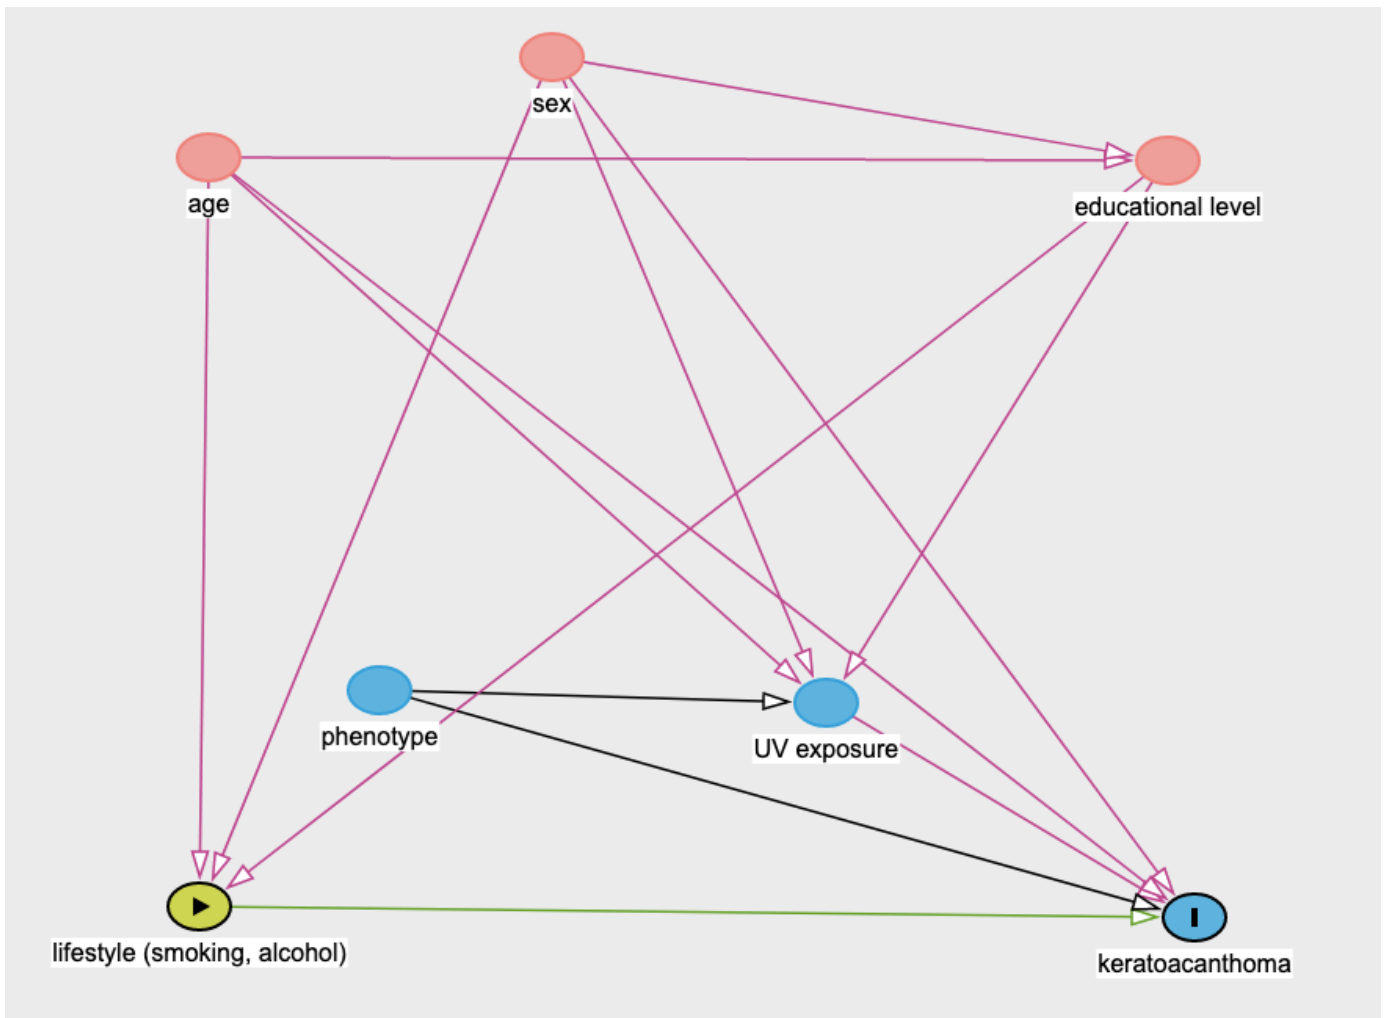

UV – ultraviolet
